# Supplementary material
Source: publisher figshare collection journal article supplement (https://diabetesjournals.figshare.com/articles/dataset/_/21932247)
Supplement: Supplementary file 1 [file 1]

**Recruiting Centres:** Basildon & Thurrock University Hospital NHS Foundation Trust, Dr Godwin Simon & Angelo Ramos RN (PIs); Hampshire Hospitals NHS Foundation Trust, Dr Andrea Norris (PI); Royal United Hospitals Bath NHS Foundation Trust, Dr Kai Tan(PI); University Hospitals Birmingham NHS Foundation Trust, Dr Parth Narendran(PI); East Lancashire Hospitals NHS Trust, Dr Shenaz Ramtoola(PI); Oakenhurst Medical Practice, Dr Amar Ali(PI); Bolton NHS Foundation Trust, Dr Moulinath Banerjee(PI); University Hospitals Dorset NHS Foundation Trust, Dr Augustin Brooks(PI); Brighton & Sussex University Hospital NHS Trust, Dr Ali Chakera(PI); North Bristol NHS Trust, Dr Andrew Johnson & Dr Danijela Tatovic (PIs); Buckinghamshire Healthcare NHS Trust, Dr Chitrabhanu Ballav (PI); Cardiff and Vale University Health Board - University Hospital of Wales, Prof Colin Dayan (PI); Countess of Chester Hospital NHS Foundation Trust, Dr Sunil Nair (PI); Derby Teaching Hospitals NHS Foundation Trust, Prof Francis Game(PI); Gloucestershire Hospitals NHS Foundation Trust, Susan Beames RN (PI); East Suffolk & North Essex NHS Foundation Trust, Prof Gerry Rayman (PI); United Lincolnshire Hospitals NHS Trust, Marie Snell RN, Susie Butler RN & Sarah Beck RN (PIs); Lincoln Community Health Services NHS Trust, Janet Beecham RN (PI); Liverpool University Hospitals NHS Foundation Trust, Prof John Wilding (PI); Hywel Dda University Health Board, Dr Sam Rice (PI); St Georges University Hospital NHS Foundation Trust, Dr Mimi Chen (PI); Western Health & Social Care Trust, Dr Athinyaa Thiraviaraj (PI); Maindstone & Tunbridge Wells NHS Trust, Dr Siva Sivappriyan(PI); Manchester University NHS Foundation Trust, Dr Basil Issa(PI); Milton Keynes University Hospital NHS Foundation Trust, Dr Asif Humayun and Rebecca Hinch RN (PIs); James Paget University Hospital NHS Foundation Trust, Dr Leena Krishnan & Dr Khin Swe Myint (PIs); Northampton General Hospital NHS Trust, Dr Charles Fox & Dr Jennifer Prouten (PIs); Norfolk & Norwich University Hospital NHS Foundation Trust, Prof Mike Sampson (PI); Nottingham University Hospital NHS Trust, Dr Peter Mansell & Dr Carolyn Chee (PIs); Oxford University Hospitals NHS Foundation Trust, Dr Katherine Owen (PI); Plymouth Hospitals NHS Trust, Dr Ioannis Dimitropoulis (PI); Portsmouth Hospitals NHS Trust, Prof Michael Cummings (PI); Royal Berkshire NHS Foundation Trust, Dr Foteini Kavourra (PI); Salford Royal Hospital, Dr Adrian Heald (PI); Sheffield Teaching Hospitals NHS Foundation Trust, Prof Simon Heller (PI); Sherwood Forest Hospitals NHS Foundation Trust, Dr Sarbpreet Sihota & Dr Vakkat Muraleedharan (PIs); The Solent NHS Trust, Dr Tara Watson (PI); Southern Health NHS Foundation Trust, Dr Hermione Price (PI); Midlands Partnership NHS Foundation Trust, Mr Roger Whittaker & Sarah Orme RN (PIs); Surrey and Sussex Healthcare NHS Trust, Dr Ben Field (PI); Swansea Bay University Health Board, Prof Stephen Bain (PI); Great Western Hospitals NHS Foundation Trust, Dr Beas Battacharya Lesley Haxton & Suzannah Pegler (PIs); Somerset NHS Foundation Trust, Catherine Thompson RN & Prof Rob Andrew (PIs); Torbay and South Devon NHS Foundation Trust, Dr Jamie Smith (PI); Royal Cornwall Hospitals NHS Trust, Dr Duncan Browne & Dr Steve Creely (PIs); Warrington & Halton Hospitals NHS Foundation Trust, Dr Rahul Yadav (PI); South Warwickshire NHS Foundation Trust, Dr Rakhi Kakad (PI); Western Sussex Hospitals NHS Foundation Trust, Dr Ken Laji(PI); Wrightington, Wigan and Leigh Teaching Hospitals NHS Foundation Trust, Dr Mohit Kumar(PI); Berkshire Healthcare NHS Foundation Trust, Dr Alirezi Mohammadi (PI); The Royal Wolverhampton NHS Trust, Dr James Young (PI); Yeovil District Hospital NHS Foundation Trust, Dr Seshadri Pramodh (PI); York & Scarborough Teaching Hospitals NHS Foundation Trust, Dr Vijay Jayagopal (PI).

**Lead Site & Coordinating Centre:** NIHR Exeter Clinical Research Facility, Royal Devon & Exeter Hospital: Dr Angus Jones (CI), Anita Hill, Robert Bolt, Suzanne Hammersley, Migaila Aldred, Anna Steele, Peter Tippet
